# Supplementary material for: A 9-gene biomarker panel identifies bacterial coinfections in culture-negative COVID-19 cases
Source: Royal Society of Chemistry journal article supplement (doi:10.1039/d2mo00100d), 2022-08-15
Supplement: d2mo00100d1.pdf [file d2mo00100d1.pdf]

## A 9-gene biomarker panel identifies bacterial coinfections in culture-negative COVID-19 cases

Ushashi Banerjee<sup>1</sup>, Pragathi Rao<sup>2</sup>, Megha Reddy<sup>3</sup>, Meeran Hussain<sup>1</sup>, Sneha Chunchanur<sup>4</sup>, Ambica R<sup>4</sup>,  
Amit Singh<sup>5</sup>, Nagasuma Chandra<sup>1,6</sup>

<sup>1</sup> Department of Biochemistry, Indian Institute of Science, Bangalore, India

<sup>2</sup> Department of Respiratory Medicine, M.S.Ramaiah Medical College Hospital, Bangalore, India

<sup>3</sup> Department of General Medicine, M.S.Ramaiah Medical College Hospital, Bangalore, India

<sup>4</sup> Bangalore Medical College and Research Institute (BMCRI), Bangalore, India

<sup>5</sup> Center for Infectious Disease Research, Indian Institute of Science, Bangalore, India

<sup>6</sup> Center for Biosystems Science and Engineering, Indian Institute of Science, Bangalore, India

**Supplementary Figure 1:** Correlation between Coinfection Score and COVID-19 severity

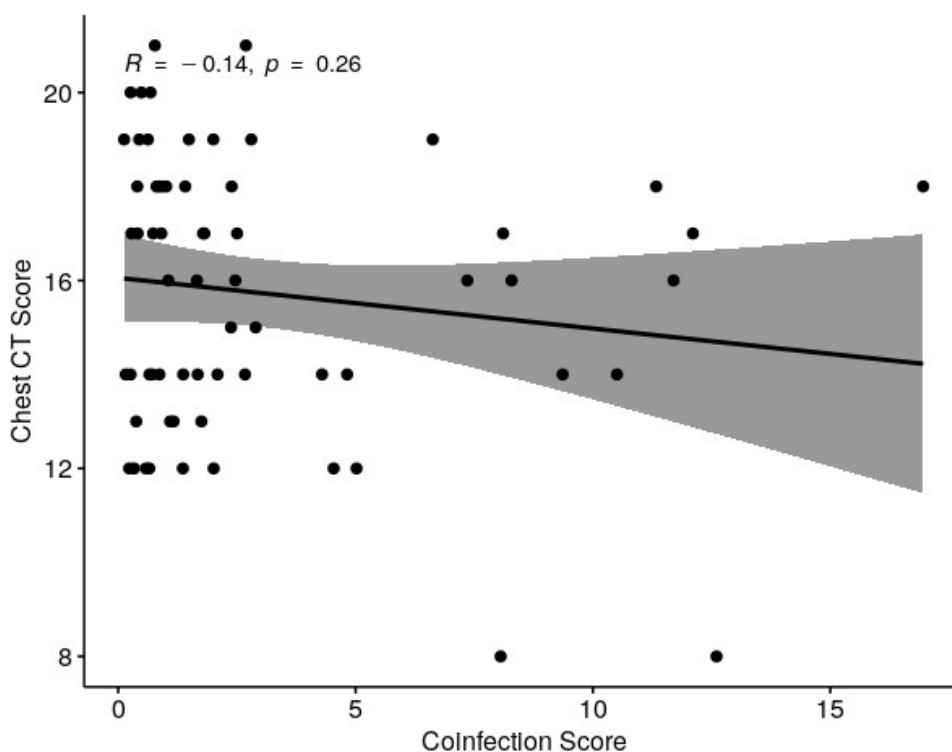

Pearson correlation is calculated between the coinfection score and chest CT score (indicative of COVID-19 severity). No association is observed between these two parameters, suggesting that the coinfection score is not dependent upon the severity of SARS-CoV-2 infection and reflects the possible bacterial coinfection.

**Supplementary Table 1:** Description and literature report in the context of bacterial infection and inflammation for the 9-gene panel.

| <b>Gene</b>    | <b>Gene Name</b>                            | <b>Description</b>                                                                                                                                                                                                                                                                                           |
|----------------|---------------------------------------------|--------------------------------------------------------------------------------------------------------------------------------------------------------------------------------------------------------------------------------------------------------------------------------------------------------------|
| <b>CR1</b>     | Complement C3b/C4b Receptor 1               | CR1 helps in bacterial recognition by phagocytes and removes pathogen and immune complex coated with complement factors C3b and C4b. This is specially important in case of <i>S. typhi</i> , <i>M. leprae</i> , <i>F. tularensis</i> etc. [1-3] CR1 is reported to be increased in bacterial infection. [4] |
| <b>F5</b>      | Coagulation Factor V                        | Cofactor for blood coagulation cascade. Coagulation system is perturbed by systemic inflammation [5] as well as bacterial infection or sepsis [6,7]. Mutation in F5 have been linked to susceptibility to bacterial infection and sepsis. [8]                                                                |
| <b>TLR2</b>    | Toll like receptor 2                        | Identifies PAMPs, most commonly on bacteria, sometimes on viruses. [9] TLR2 expression increases in response to LPS stimulation.[10] It has been suggested as a therapeutic target to moderate immune response in bacterial infections.[11]                                                                  |
| <b>TLR8</b>    | Toll like receptor 8                        | Recognized PAMPs, most commonly viral RNA, also pyrogenic bacteria. [12] TLR8 can also recognize URR motifs in bacterial RNA.[13,14] TLR8 can be activated and upregulated by <i>M. bovis</i> and <i>H. pylori</i> . [15]                                                                                    |
| <b>MKNK1</b>   | MAPK Interacting Serine/Threonine Kinase 1  | Kinase that plays a role in response to stress and cytokines. Works downstream of MAPK and ERKs.                                                                                                                                                                                                             |
| <b>PFKFB3</b>  | Fructose-2,6-Biphosphatase 3                | Involved in both the synthesis and degradation of fructose-2,6-bisphosphate, a regulatory molecule that controls glycolysis. Linked to HIF1a mediated inflammation. [16,17] It has been implicated in neutrophil activation in sepsis and LPS induced endotoxemia.[18,19]                                    |
| <b>PPP1R3D</b> | Protein Phosphatase 1 Regulatory Subunit 3D | Involved in regulation of cell division, metabolism etc. Part of inflammasome and overexpressed in TB [20] and is upregulated in ventilator associated pneumonia.[21]                                                                                                                                        |
| <b>SH3GLB1</b> | SH3 Domain Containing GRB2                  | Involved in regulating apoptotic pathway. It is                                                                                                                                                                                                                                                              |

|             |                                            |                                                                                                                                                                                                          |
|-------------|--------------------------------------------|----------------------------------------------------------------------------------------------------------------------------------------------------------------------------------------------------------|
|             | Like                                       | involved in autophagy and overexpressed in leprosy lesions. <sup>[22]</sup>                                                                                                                              |
| <b>ETS2</b> | ETS Proto-Oncogene 2, Transcription Factor | Involved in development and apoptosis. Linked to interleukin-12 mediated inflammatory response and can be induced by LPS. <sup>[23,24]</sup> It is induced in <i>H.pylori</i> infection. <sup>[25]</sup> |

**Supplementary Table 2:** Performance evaluation of clinical parameters individually shows high sensitivity but very limited specificity.

| Parameters | Specificity | Sensitivity |
|------------|-------------|-------------|
| PCT        | 0           | 1           |
| CRP        | 0           | 1           |
| ESR        | 0           | 1           |
| TLC        | 0.5         | 0.97        |
| NLR        | 0.5         | 0.97        |

An ideal biomarker should have both specificity and sensitivity of 1, meaning all the positive cases are identified as positive and negative cases are identified as negative. Specificity or sensitivity of 0.5 means that the test is equivalent to a random draw. The basic minimum for any biomarker is specificity+sensitivity > 1, and a decent biomarker should have specificity+sensitivity > 1.5. WHO criteria for a triage test biomarker includes a minimum of 0.7 specificity and 0.9 sensitivity. None of the clinical markers cross the threshold of minimum specificity and sensitivity, while the values for some are worse than a random draw. This suggests while the clinical markers perform well in identifying true positives, their performance in identifying the true negative cases are poor.

## Supplementary Reference:

1. Schlesinger LS, Horwitz MA. Phagocytosis of leprosy bacilli is mediated by complement receptors CR1 and CR3 on human monocytes and complement component C3 in serum. *J Clin Invest.* 1990 Apr 1;85(4):1304–14.
2. Schwartz JT, Barker JH, Long ME, Kaufman J, McCracken J, Allen LAH. Natural IgM Mediates Complement-Dependent Uptake of *Francisella tularensis* by Human Neutrophils via Complement Receptors 1 and 3 in Nonimmune Serum. *The Journal of Immunology.* 2012 Sep 15;189(6):3064–77.
3. Ishibashi Y, Arai T. A possible mechanism for host-specific pathogenesis of *Salmonella* serovars. *Microbial Pathogenesis.* 1996 Dec 1;21(6):435–46.
4. Nuutila J, Hohenthal U, Laitinen I, Kotilainen P, Rajamäki A, Nikoskelainen J, et al. Quantitative analysis of complement receptors, CR1 (CD35) and CR3 (CD11b), on neutrophils improves distinction between bacterial and viral infections in febrile patients: Comparison with standard clinical laboratory data. *Journal of Immunological Methods.* 2006 Aug 31;315(1):191–201.
5. Levi M, Keller TT, van Gorp E, ten Cate H. Infection and inflammation and the coagulation system. *Cardiovascular Research.* 2003 Oct 15;60(1):26–39.
6. Loof TG, Deicke C, Medina E. The role of coagulation/fibrinolysis during *Streptococcus pyogenes* infection. *Frontiers in Cellular and Infection Microbiology* [Internet]. 2014 [cited 2022 Jun 16];4. Available from: <https://www.frontiersin.org/article/10.3389/fcimb.2014.00128>
7. Kastrup CJ, Boedicker JQ, Pomerantsev AP, Moayeri M, Bian Y, Pompano RR, et al. Spatial localization of bacteria controls coagulation of human blood by ‘quorum acting.’ *Nat Chem Biol.* 2008 Dec;4(12):742–50.
8. Schouten M, van 't Veer C, van der Poll T, Levi M. Effect of the factor V Leiden mutation on the incidence and outcome of severe infection and sepsis. *Neth J Med.* 2012 Sep;70(7):306-10.
9. Oliveira-Nascimento L, Massari P, Wetzler LM. The role of TLR2 in infection and immunity. *Frontiers in Immunology.* 2012;3. doi:10.3389/fimmu.2012.00079
10. Lorenz E. TLR2 and TLR4 Expression During Bacterial Infections. *Current Pharmaceutical Design.* 12(32):4185–93.
11. Simpson ME, Petri WA. TLR2 as a Therapeutic Target in Bacterial Infection. *Trends Mol Med.* 2020 Aug;26(8):715–7.
12. Moen SH, Ehrnström B, Kojen JF, et al. Human toll-like receptor 8 (TLR8) is an important sensor of pyogenic bacteria, and is attenuated by cell surface TLR signaling. *Frontiers in Immunology.* 2019;10. doi:10.3389/fimmu.2019.01209
13. Krüger A, Oldenburg M, Chebrolu C, Beisser D, Kolter J, Sigmund AM, et al. Human TLR8 senses UR/URR motifs in bacterial and mitochondrial RNA. *EMBO Rep.* 2015 Dec;16(12):1656–63.
14. Eigenbrod T, Pelka K, Latz E, Kreikemeyer B, Dalpke AH. TLR8 Senses Bacterial RNA in Human Monocytes and Plays a Nonredundant Role for Recognition of *Streptococcus pyogenes*. *The Journal of Immunology.* 2015 Aug 1;195(3):1092–9.
15. Cervantes JL, Weinerman B, Basole C, Salazar JC. TLR8: the forgotten relative revindicated. *Cell Mol Immunol.* 2012 Nov;9(6):434–8.
16. Tawakol A, Singh P, Mojena M, et al. HIF-1 $\alpha$  and PFKFB3 mediate a tight relationship between proinflammatory activation and ANEROBIC metabolism in atherosclerotic macrophages. *Arteriosclerosis, Thrombosis, and Vascular Biology.* 2015;35(6):1463-1471. doi:10.1161/atvbaha.115.305551
17. Li C, Wang Y, Li Y, et al. HIF1A-dependent glycolysis promotes macrophage functional activities in protecting against bacterial and fungal infection. *Scientific Reports.* 2018;8(1). doi:10.1038/s41598-018-22039-9
18. Xu J, Wang L, Yang Q, Ma Q, Zhou Y, Cai Y, et al. Deficiency of Myeloid Pfkfb3 Protects Mice From Lung Edema and Cardiac Dysfunction in LPS-Induced Endotoxemia. *Frontiers in Cardiovascular Medicine* [Internet]. 2021 [cited 2022 Jun 17];8. Available from: <https://www.frontiersin.org/article/10.3389/fcvm.2021.745810>
19. Liu D, Sun W, Zhang D, Yu Z, Qin W, Liu Y, et al. Long noncoding RNA GSEC promotes neutrophil inflammatory activation by supporting PFKFB3-involved glycolytic metabolism in sepsis. *Cell Death Dis.* 2021 Dec 14;12(12):1157.
20. Moreira-Teixeira L, Tabone O, Graham CM, et al. Mouse transcriptome reveals potential signatures of protection and pathogenesis in human tuberculosis. *Nature Immunology.* 2020;21(4):464-476.

doi:10.1038/s41590-020-0610-z

21. McDunn JE, Husain KD, Polpitiya AD, Burykin A, Ruan J, Li Q, et al. Plasticity of the Systemic Inflammatory Response to Acute Infection during Critical Illness: Development of the Riboleukogram. *PLoS One*. 2008 Feb 13;3(2):e1564.
22. Silva BJ de A, Barbosa MG de M, Andrade PR, Ferreira H, Nery JA da C, Côte-Real S, et al. Autophagy Is an Innate Mechanism Associated with Leprosy Polarization. *PLOS Pathogens*. 2017 Jan 5;13(1):e1006103.
23. Chung SW, Chen Y-H, Perrella MA. Role of ETS-2 in the regulation of heme oxygenase-1 by endotoxin. *Journal of Biological Chemistry*. 2005;280(6):4578-4584. doi:10.1074/jbc.m409125200
24. Ma X, Neurath M, Gri G, Trinchieri G. Identification and characterization of a novel ETS-2-related nuclear complex implicated in the activation of the human interleukin-12 P40 gene promoter. *Journal of Biological Chemistry*. 1997;272(16):10389-10395. doi:10.1074/jbc.272.16.10389
25. Das L, Kokate SB, Rath S, Rout N, Singh SP, Crowe SE, et al. ETS2 and Twist1 promote invasiveness of *Helicobacter pylori*-infected gastric cancer cells by inducing Siah2. *Biochem J*. 2016 Jun 1;473(11):1629–40.
