# Supplementary material for: A 9-gene biomarker panel identifies bacterial coinfections in culture-negative COVID-19 cases
Source: Royal Society of Chemistry journal article supplement (doi:10.1039/d2mo00100d), 2022-08-15
Supplement: d2mo00100d2.xlsx [file d2mo00100d2.xlsx]

## Sheet: Supp_file_1_Adjudication_and_Classification
Sample_ID	Adjudicator_1	Adjudicator_2	Adjudicator_3	Adjudicator_consensus	Authors_catergorization	Final_class
Cov_1	Unlikely	Unlikely		Unlikely	Unlikely	Unlikely
Cov_10	Unlikely	Unlikely		Unlikely	Unlikely	Unlikely
Cov_11	Unlikely	Unlikely	Unlikely	Unlikely	Unlikely	Unlikely
Cov_12	Unlikely	Unlikely	Unlikely	Unlikely	Unlikely	Unlikely
Cov_13	Unlikely	Unlikely		Unlikely	Unlikely	Unlikely
Cov_14	Unlikely	Unlikely		Unlikely	Unlikely	Unlikely
Cov_15	Unlikely	Unlikely		Unlikely	Unlikely	Unlikely
Cov_16	Unlikely	Unlikely		Unlikely	Unlikely	Unlikely
Cov_17	Unlikely	Unlikely		Unlikely	Unlikely	Unlikely
Cov_18	Unlikely	Unlikely		Unlikely	Unlikely	Unlikely
Cov_19	Unlikely	Unlikely		Unlikely	Unlikely	Unlikely
Cov_2	Unlikely	Unlikely		Unlikely	Unlikely	Unlikely
Cov_20	Unlikely	Unlikely		Unlikely	Unlikely	Unlikely
Cov_21	Unlikely	Unlikely		Unlikely	Unlikely	Unlikely
Cov_22	Unlikely	Unlikely		Unlikely	Unlikely	Unlikely
Cov_23	Unlikely	Possible	Unlikely	Unlikely	Unlikely	Unlikely
Cov_24	Unlikely	Unlikely		Unlikely	Unlikely	Unlikely
Cov_25	Unlikely	Unlikely		Unlikely	Unlikely	Unlikely
Cov_26	Unlikely	Unlikely		Unlikely	Unlikely	Unlikely
Cov_27	Unlikely	Unlikely		Unlikely	Unlikely	Unlikely
Cov_3	Unlikely	Possible	Unlikely	Unlikely	Unlikely	Unlikely
Cov_4	Unlikely	Unlikely	Unlikely	Unlikely	Unlikely	Unlikely
Cov_5	Unlikely	Unlikely	Unlikely	Unlikely	Unlikely	Unlikely
Cov_6	Unlikely	Possible	Unlikely	Unlikely	Unlikely	Unlikely
Cov_7	Unlikely	Unlikely		Unlikely	Unlikely	Unlikely
Cov_8	Unlikely	Unlikely		Unlikely	Unlikely	Unlikely
Cov_9	Unlikely	Unlikely		Unlikely	Unlikely	Unlikely
Pb_1	Probable	Probable	Probable	Probable	Probable	Probable
Pb_10	Probable	Probable	Possible	Probable	Probable	Probable
Pb_11	Probable	Probable	Probable	Probable	Probable	Probable
Pb_12	Probable	Probable	Possible	Probable	Probable	Probable
Pb_13	Probable	Probable	Probable	Probable	Probable	Probable
Pb_14	Possible	Probable	Probable	Probable	Probable	Probable
Pb_15	Probable	Probable	Probable	Probable	Probable	Probable
Pb_16	Probable	Probable	Probable	Probable	Probable	Probable
Pb_17	Probable	Probable	Probable	Probable	Probable	Probable
Pb_18	Probable	Probable	Possible	Probable	Probable	Probable
Pb_2	Possible	Probable	Probable	Probable	Probable	Probable
Pb_3	Unlikely	Probable	Probable	Probable	Probable	Probable
Pb_4	Probable	Probable	Probable	Probable	Probable	Probable
Pb_5	Probable	Probable	Probable	Probable	Probable	Probable
Pb_6	Probable	Probable	Probable	Probable	Probable	Probable
Pb_7	Probable	Probable	Probable	Probable	Probable	Probable
Pb_8	Probable	Probable	Probable	Probable	Probable	Probable
Pb_9	Probable	Probable	Probable	Probable	Probable	Probable
Sb_1	Possible	Probable	Possible	Possible	Possible	Possible
Sb_10	Probable	Possible	Possible	Possible	Probable	Not_Same
Sb_11	Possible	Probable	Possible	Possible	Probable	Not_Same
Sb_12	Possible	Probable	Possible	Possible	Probable	Not_Same
Sb_13	Probable	Possible	Possible	Possible	Probable	Not_Same
Sb_14	Unlikely	Probable	Possible	No_consensus	Probable	Not_Same
Sb_15	Possible	Probable	Possible	Possible	Probable	Not_Same
Sb_16	Probable	Probable	Probable	Probable	Possible	Not_Same
Sb_17	Possible	Probable	Probable	Probable	Possible	Not_Same
Sb_18	Probable	Probable	Probable	Probable	Possible	Not_Same
Sb_19	Unlikely	Probable	Possible	No_consensus	Possible	Not_Same
Sb_2	Possible	Probable	Possible	Possible	Possible	Possible
Sb_20	Probable	Probable	Probable	Probable	Possible	Not_Same
Sb_21	Possible	Probable	Probable	Probable	Possible	Not_Same
Sb_22	Probable	Probable	Probable	Probable	Possible	Not_Same
Sb_23	Possible	Probable	Probable	Probable	Possible	Not_Same
Sb_24	Possible	Probable	Probable	Probable	Possible	Not_Same
Sb_25	Possible	Probable	Probable	Probable	Possible	Not_Same
Sb_26	Possible	Probable	Unlikely	No_consensus	Possible	Not_Same
Sb_27	Unlikely	Probable	Possible	No_consensus	Possible	Not_Same
Sb_28	Probable	Probable	Probable	Probable	Possible	Not_Same
Sb_29	Probable	Probable	Probable	Probable	Possible	Not_Same
Sb_3	Possible	Probable	Possible	Possible	Probable	Possible
Sb_30	Unlikely	Probable	Possible	No_consensus	Possible	Not_Same
Sb_31	Unlikely	Probable	Possible	No_consensus	Possible	Not_Same
Sb_32	Unlikely	Probable	Unlikely	Unlikely	Possible	Not_Same
Sb_33	Probable	Probable	Possible	Probable	Possible	Not_Same
Sb_34	Unlikely	Probable	Possible	No_consensus	Possible	Not_Same
Sb_35	Unlikely	Probable	Possible	No_consensus	Probable	Not_Same
Sb_36	Possible	Probable	Probable	Probable	Possible	Not_Same
Sb_37	Probable	Probable	Possible	Probable	Possible	Not_Same
Sb_38	Unlikely	Probable	Possible	No_consensus	Possible	Not_Same
Sb_39	Possible	Probable	Probable	Probable	Possible	Not_Same
Sb_4	Unlikely	Probable	Possible	No_consensus	Unlikely	Not_Same
Sb_40	Unlikely	Probable	Probable	Probable	Possible	Not_Same
Sb_41	Unlikely	Probable	Possible	No_consensus	Possible	Not_Same
Sb_42	Unlikely	Probable	Possible	No_consensus	Possible	Not_Same
Sb_43	Unlikely	Probable	Possible	No_consensus	Possible	Not_Same
Sb_44	Possible	Probable	Probable	Probable	Possible	Not_Same
Sb_45	Unlikely	Unlikely	Probable	Unlikely	Possible	Not_Same
Sb_46	Probable	Possible	Unlikely	No_consensus	Possible	Not_Same
Sb_47	Unlikely	Probable	Unlikely	Unlikely	Possible	Not_Same
Sb_5	Unlikely	Possible	Possible	Possible	Unlikely	Not_Same
Sb_6	Unlikely	Probable	Probable	Probable	Unlikely	Not_Same
Sb_7	Unlikely	Probable	Possible	No_consensus	Unlikely	Not_Same
Sb_8	Unlikely	Probable	Possible	No_consensus	Unlikely	Not_Same
Sb_9	Possible	Probable	Possible	Possible	Probable	Not_Same
Seq_CoV_1	Unlikely	Unlikely		Unlikely	Unlikely	Unlikely
Seq_CoV_10	Unlikely	Unlikely		Unlikely	Unlikely	Unlikely
Seq_CoV_11	Unlikely	Unlikely	Unlikely	Unlikely	Unlikely	Unlikely
Seq_CoV_12	Unlikely	Unlikely		Unlikely	Unlikely	Unlikely
Seq_CoV_13	Unlikely	Unlikely		Unlikely	Unlikely	Unlikely
Seq_CoV_14	Unlikely	Unlikely		Unlikely	Unlikely	Unlikely
Seq_CoV_15	Unlikely	Unlikely		Unlikely	Unlikely	Unlikely
Seq_CoV_16	Unlikely	Unlikely		Unlikely	Unlikely	Unlikely
Seq_CoV_17	Unlikely	Unlikely		Unlikely	Unlikely	Unlikely
Seq_CoV_2	Unlikely	Unlikely		Unlikely	Unlikely	Unlikely
Seq_CoV_3	Unlikely	Unlikely		Unlikely	Unlikely	Unlikely
Seq_CoV_4	Unlikely	Unlikely		Unlikely	Unlikely	Unlikely
Seq_CoV_5	Unlikely	Unlikely		Unlikely	Unlikely	Unlikely
Seq_CoV_6	Unlikely	Unlikely		Unlikely	Unlikely	Unlikely
Seq_CoV_7	Unlikely	Unlikely		Unlikely	Unlikely	Unlikely
Seq_CoV_8	Unlikely	Unlikely		Unlikely	Unlikely	Unlikely
Seq_CoV_9	Unlikely	Unlikely		Unlikely	Unlikely	Unlikely
Seq_Pb_1	Probable	Probable	Probable	Probable	Probable	Probable
Seq_Pb_2	Probable	Probable	Probable	Probable	Probable	Probable
Seq_Pb_3	Probable	Probable	Probable	Probable	Probable	Probable
Seq_Pb_4	Probable	Probable	Probable	Probable	Probable	Probable
Seq_Pb_5	Probable	Probable	Probable	Probable	Probable	Probable
Seq_Pb_6	Probable	Probable	Probable	Probable	Probable	Probable

## Sheet: Supp_File_2_Primer_List
Gene	Sequence
CR1 – F	TTTGCCAGTCCTACGATCCC
CR1 – R	GAAGGGTTCTGGTGGAGGTC
F5 – F	CAGCCACACGACTCTCTCTC
F5 – R	CGAGGGCTGGAGAAAGGTTT
MKNK1 – F	CAAGGACTGGGCACACATCT
MKNK1 – R	AGAGCGTCAGGTCCATTGTG
PPP1R3D – F	ACTACAGCCTCACATGTCGC
PPP1R3D – R	GGACTTGGAGGGTGGTGAAG
TLR2 – F	GAAAATGATGTGGGCCTGGC
TLR2 – R	CCAGGAATGAAGTCCCGCTT
TLR8 – F	TGCCTCATCTGAAGGTGCTG
TLR8 – R	TGCAATGCCCGTAGAGACAA
ETS2_F	GGCTGTGATGAGTCAAGCCT
ETS2_R	CAGCATCTGGCCATTCATGC
PFKFB3_F	TCTCGTGCCCAGATGAAACC
PFKFB3_R	TTCTCTCCACGCCCAGTTTC
SH3GLB1_F	CCATGGCTTCAACAAGTGGC
SH3GLB1_R	GCCCTTCTGGTTTCCCCTTT
ACTB – F	TGGAACGGTGAAGGTGACAG
ACTB – R	TGTGTGGACTTGGGAGAGGA

## Sheet: Supp_File_3_DEG_list
SYMBOL	logFC	P.Value
ABAT	0.968854	0.0299004
ABHD12B	1.77888	0.00623103
ABHD5	1.06079	0.0142789
ABLIM3	1.1254	0.0498414
ACOX1	0.988648	0.0123723
ACSL1	1.31905	0.0147807
ACSL4	1.56605	0.0436783
ACTN1	0.890935	0.0291477
ADAM17	1.13562	0.0487687
ADAM19	0.864822	0.0421963
ADAM9	1.45114	0.033739
ADCK5	-2.13744	0.025274
ADGRE2	1.23064	0.00338319
ADM	1.01243	0.0273052
AGFG1	1.23483	0.0144346
AGO2	0.897763	0.0191623
AGO4	1.07642	0.0239358
AHCTF1	1.19093	0.017275
AIRN	1.79094	0.0213279
ALOX5AP	0.920143	0.0364297
ALPL	1.42054	0.0218324
AMDHD2	-1.37613	0.0290392
AMPH	1.64718	0.0229375
ANKRD55	1.27031	0.0131883
ANO10	0.897923	0.0347003
ANP32A	0.781642	0.0268792
ANXA2R	-1.39595	0.0471003
APBB1IP	1.12039	0.00225867
APBB2	1.65723	0.0136825
APTR	0.966363	0.0282008
AQP9	1.29108	0.00538857
ARFGAP3	0.889755	0.0480958
ARHGAP26	1.24904	0.00198038
ARHGDIB	0.636741	0.0300041
ARSD-AS1	2.78172	0.00568279
ASAP1	1.18891	0.00558006
ASPH	2.08592	0.00445859
ATF6	0.894803	0.0290765
ATP2B4	1.10985	0.0237976
ATP6V1C1	1.00194	0.0473636
ATP9A	1.8374	0.00168155
ATXN1	1.03978	0.032801
BASP1	1.36066	0.00156653
BCL6	1.30995	0.0154781
BMX	1.59865	0.0178617
BOD1L1	0.934715	0.0141005
BRWD3	1.16501	0.0451979
BSG	-0.782396	0.0101051
BST2	-1.1724	0.0290944
BTNL8	0.953425	0.0361288
C19orf48	-1.32208	0.0424239
C5AR1	1.06874	0.00860582
C5orf30	1.67432	0.0376892
C9orf84	1.68893	0.00925854
CAB39	1.20661	0.0366305
CACUL1	0.905956	0.0446491
CALD1	1.14035	0.0491239
CAP1	0.70521	0.0441174
CASC3	0.734107	0.0115594
CASP5	1.13901	0.0464629
CCNJL	1.23837	0.012784
CCPG1	1.20973	0.0430099
CCS	-0.714921	0.0483537
CD55	1.34558	0.00611097
CD93	1.02692	0.0465888
CDC42EP3	1.01817	0.0193129
CDK5RAP2	0.898965	0.0411932
CEP19	1.08885	0.00622323
CEP295NL	1.62065	0.00589427
CEP63	0.907222	0.0293399
CFAP45	1.19979	0.0472945
CFLAR	0.980181	0.0164269
CHD7	0.908987	0.019471
CHID1	-0.820721	0.0491027
CHST15	0.943345	0.0228394
CHSY1	1.15654	0.0330977
CKAP4	1.13401	0.0129194
CLIP1	1.31103	0.00349608
CLMN	1.03006	0.0151238
CNPPD1	-0.622783	0.0134829
CPPED1	0.800976	0.0228872
CPQ	0.735704	0.0463288
CR1	1.39845	0.0130134
CREB5	1.2342	0.0165217
CRISPLD2	1.00726	0.0479334
CSF2RA	0.814805	0.0381315
CST7	1.03892	0.0322954
CTBP2	0.946942	0.0243182
CTBS	1.20765	0.0169678
CXCR1	0.826959	0.023243
CXCR2	1.37767	0.000463845
CYP1B1	1.61862	0.0426967
CYP1B1-AS1	1.56124	0.0273519
CYSTM1	0.991551	0.0449046
DACH1	1.46735	0.0265534
DDX11	-1.61823	0.0165195
DGAT2	0.869459	0.0456315
DHRS7	0.680074	0.0350997
DIRC2	1.32273	0.00916615
DISC1	1.20398	0.033087
DLEU1	0.991926	0.0362647
DNAJC25-GNG10	1.5117	0.0427843
DNAJC3	1.09361	0.0467314
DOCK5	1.02419	0.0352782
DOHH	-1.19721	0.0418409
DOK3	1.04524	0.0101004
E2F3	1.45241	0.0222669
EFHC2	2.23093	0.00742558
EGLN1	1.00682	0.0325251
ELOF1	-0.596875	0.0340646
EMILIN2	0.784169	0.0472966
ENTPD1-AS1	0.927499	0.0382426
EP300	0.988982	0.0433812
ERICH1	0.762931	0.0464813
ERN1	1.01858	0.0374051
ETS2	1.49623	0.00235225
EVI2B	1.37126	0.00807158
F13A1	1.15259	0.0478369
F5	1.54072	0.00623551
FAM126B	1.32608	0.0127976
FAM129A	1.59853	0.000521188
FAM53C	0.746937	0.0339338
FAM71F2	1.28063	0.0230789
FBXL13	1.41884	0.0277982
FCAR	1.36663	0.0181652
FCER1G	0.836026	0.0399124
FCGR2A	1.19523	0.00197826
FCGR2C	1.19523	0.00197826
FCHO2	1.57157	0.0219485
FKBP5	1.47323	0.04402
FNDC3B	1.24768	0.0196301
FNIP1	1.30215	0.0211343
FOSL2	0.915235	0.0238683
FPR1	0.747644	0.0380278
FPR2	1.08448	0.0364339
FRAT2	0.695512	0.0383691
FSTL1	1.38324	0.0202584
FTH1	0.769667	0.00748996
FUOM	-1.57055	0.0382838
GAB2	0.916236	0.0249857
GAS7	0.945784	0.0457137
GATAD2B	0.899024	0.0252974
GIT2	0.823056	0.0306956
GLT1D1	0.884234	0.0249052
GNB1L	-1.57197	0.046984
GNG5	0.891529	0.0131874
GPR27	1.15338	0.0338242
GSDMD	-1.14414	0.0235246
GTDC1	1.27738	0.00760734
GTF2IP12	1.46563	0.0361647
GYG1	1.09776	0.0317231
HAL	1.10845	0.0120971
HEBP1	-0.906133	0.0252805
HECW2	1.46183	0.0299506
HIF1A	1.45751	0.0214702
HIP1	1.05562	0.00895121
HIPK2	1.00241	0.0285384
HIST1H2BC	1.34689	0.0053217
HLA-DQA1	-2.19441	0.0244976
HLA-DQB1	-1.80205	0.04575
HLA-DRB1	-1.3432	0.0347574
HLA-L	-1.98186	0.0419718
HMBS	-0.853417	0.0433146
HPSE	1.04719	0.043351
HRH2	1.11191	0.0154521
HSCB	-1.31634	0.0368493
HSDL2	1.12791	0.01861
HSPBAP1	0.988272	0.0328544
IDS	0.864699	0.022873
IFI35	-1.38379	0.0259475
IFI6	-2.33879	0.0095269
IFIT1	-2.64982	0.0300364
IFITM2	0.805974	0.0472983
IFNAR1	0.974178	0.0248708
IGF1R	1.10156	0.0185344
IL10RB	0.724835	0.0331124
IL13RA1	1.04449	0.0278344
IL17RA	0.855636	0.0225237
IL1R1	1.65683	0.0165125
IL1RAP	1.49473	0.0280253
IL4R	0.844803	0.0202221
IL6R	0.662273	0.0396992
INHBB	1.65529	0.0475608
IQGAP1	1.18944	0.022202
IRAK3	1.65922	0.0251712
IRS2	1.26961	0.0276085
ISG15	-2.3781	0.0396973
ITGAX	0.765699	0.0171445
ITM2B	0.888433	0.014986
KAT6A	1.03389	0.015887
KCNJ2	1.1881	0.0456426
KCNRG	1.62927	0.013613
KDM3B	0.821508	0.0422035
KDM6B	1.0386	0.0093814
KIAA0040	0.777717	0.0391477
KIAA0232	1.08801	0.0304462
KIAA0319	1.10632	0.0272112
KIAA0825	1.46205	0.0427829
KIF13A	1.10875	0.0173674
KIF1B	1.41768	0.00492291
KIF27	1.70494	0.00732712
KIF3C	1.13054	0.0137517
KLF7	1.02695	0.0129525
KLHL2	1.69936	0.0156153
KLHL8	1.08483	0.0490305
KRAS	1.15483	0.0370913
KREMEN1	1.11911	0.034054
LAMP2	0.874832	0.0413114
LCN10	-2.21226	0.0375788
LETM2	1.08623	0.015156
LGALSL	1.10475	0.0444164
LIN54	1.21675	0.0373049
LINC00654	1.37238	0.020659
LINC00694	1.14843	0.0459323
LINC01271	2.00713	0.0109896
LINC01531	1.23079	0.0138817
LINC02035	1.26154	0.0243642
LITAF	0.783936	0.0216764
LMNB1	0.990335	0.0316322
LMNTD2	-1.85899	0.022391
LOC100128966	0.746937	0.0339338
LOC100506606	1.44768	0.0145114
LOC101927989	1.6807	0.0273413
LOC101928143	1.12852	0.00978532
LOC105369236	-1.43529	0.0385697
LOC254896	0.757895	0.039639
LOC399715	1.27743	0.0305633
LPCAT3	0.749436	0.0340411
LRRC37A3	1.0157	0.0328318
LRRC4	1.00875	0.0166887
LRRFIP1	0.818851	0.015022
LRRN1	1.50676	0.0437962
LSM7	-1.64457	0.0209539
LUCAT1	1.06996	0.0182602
LY6E	-2.23256	0.0206714
LYN	1.172	0.00712747
LYVE1	1.80864	0.0140403
MAK	1.76285	0.00128386
MALAT1	1.45376	0.0393716
MAML3	1.20076	0.0265849
MANSC1	1.67133	0.00189425
MAP3K20	0.98685	0.031324
MAP3K5	0.938587	0.0498498
MAP4K4	0.833971	0.0124619
MAPK1	0.766485	0.0445539
MAPK13	0.919396	0.0190191
MAPK14	1.13524	0.0158416
MARCKS	1.14321	0.0159904
MBP	0.856996	0.0199723
MCC	1.43602	0.00362598
MCTP2	1.47863	0.00525416
MEFV	0.850281	0.0481858
MEGF9	1.19604	0.0429679
MFN2	0.819481	0.0308437
MFSD12	-0.886148	0.0491976
MGAM	1.52895	0.0110775
MKNK1	1.17481	0.00463484
MLLT1	0.689239	0.048929
MME	1.05774	0.0337828
MNDA	0.928852	0.0356946
MOB2	-0.720712	0.0477354
MOSPD2	1.35902	0.0170097
MRVI1	1.37746	0.00127094
MSL1	0.923662	0.0344763
MSN	0.882769	0.0244569
MTF1	0.928455	0.036661
MTG1	-1.43879	0.0361777
MXD1	1.08675	0.0228573
MYADM	0.898331	0.0305693
MYD88	0.767557	0.0318499
MYH11	1.00839	0.0150287
MYLK	1.21114	0.0321085
N4BP1	0.916885	0.00961108
NABP1	0.99553	0.0496996
NAIP	1.40559	0.00899022
NAMPT	1.30191	0.0165254
NCF2	0.795684	0.0222058
NCOA1	1.03261	0.007161
NCOA6	1.027	0.0285096
ND1	1.12478	0.0465429
NDEL1	0.840753	0.0237738
NEAT1	0.84917	0.0407281
NFAT5	1.14579	0.0367142
NFE4	1.31528	0.0292405
NFIL3	1.21482	0.00889715
NHSL2	0.947367	0.0305693
NLRP3	1.0137	0.0437763
NME8	1.28152	0.0300196
NPDC1	-2.38284	0.0131816
NRBF2	1.04061	0.0209379
NSUN7	2.04943	0.0038396
NUMB	1.12852	0.00978532
NUP153	1.0239	0.0475264
OSBPL2	0.750731	0.0308908
OSBPL8	1.4774	0.0376846
OSBPL9	1.04766	0.0200527
OTX1	1.88009	0.00830225
PACSIN2	0.791781	0.0152466
PAK2	0.957757	0.0456374
PAPLN	0.866468	0.0344567
PARP10	-1.27246	0.0300478
PCNX1	1.1594	0.00697658
PCYT1A	0.787153	0.0418745
PDZD8	1.20554	0.032497
PFKFB3	1.07962	0.0278325
PGD	0.949625	0.0384411
PHF12	0.814026	0.0283581
PHF21A	0.979286	0.0104477
PHLPP1	1.03716	0.0352516
PHTF1	1.22474	0.0390098
PICALM	0.966798	0.0465304
PIDD1	-1.41494	0.0465285
PIGQ	-0.949477	0.0459914
PLXDC2	0.934917	0.0479425
PLXNC1	1.35023	0.0171332
PNRC1	0.869731	0.0294497
PPP1R3B	1.31731	0.0108053
PPP1R3D	1.25886	0.0190492
PPP3CA	0.984053	0.0420831
PPP4R1	1.07044	0.0322799
PQLC1	-0.930284	0.0377761
PRKACA	0.819782	0.0241667
PRKAR2B	1.31958	0.0487792
PROK2	1.20166	0.0205343
PSMB10	-1.15983	0.0187732
PSME1	-0.738074	0.0479113
PTPN12	1.18919	0.0302421
PTPRE	0.861479	0.0344885
PXK	1.08674	0.020277
PXYLP1	1.37196	0.0355913
PYGL	1.2029	0.0129927
RAB11FIP1	1.0087	0.0313092
RAB27A	0.910123	0.0362962
RAB31	1.00508	0.0386025
RAB7A	0.967217	0.00809047
RAD23B	1.07041	0.00932787
RALB	1.13304	0.0123417
RALGAPA2	1.09457	0.0226005
RARRES3	-1.34295	0.0426114
RASSF2	0.808519	0.0495018
RASSF3	1.08242	0.0435648
RBM47	1.23531	0.0185006
RBMS1	0.991586	0.0147684
RBPJ	0.828571	0.0273197
RFFL	0.817887	0.0244922
RFX2	1.10557	0.0237206
RIPOR2	0.807305	0.02991
RIT1	1.05816	0.0395615
RNF149	0.829826	0.0322437
RNF175	1.1201	0.0451478
RNF182	3.51184	0.00017366
RNF24	0.782523	0.0420285
RNR1	0.934787	0.0309755
RNR2	0.928801	0.0435986
RPGR	1.0161	0.0166358
RPS10-NUDT3	-2.57543	0.00993106
RPS9	-0.832483	0.0479204
RRBP1	0.852218	0.0430744
RTN3	0.83768	0.0344703
S100A11	0.989499	0.0100702
SAC3D1	-1.21787	0.0350922
SBF2	1.23386	0.0177789
SCO2	-1.52829	0.0493449
SDCBP	1.19068	0.011971
SELL	0.800103	0.0409513
SERPINA1	0.849086	0.0247125
SH3GLB1	1.14846	0.00740749
SIPA1L2	1.45985	0.0181479
SIRPA	0.93698	0.0146167
SIRPB1	1.27793	0.0042846
SIRPB2	0.893298	0.0408028
SIRPD	1.0944	0.0368528
SLC12A6	1.10182	0.0180007
SLC15A4	0.87434	0.0491205
SLC16A6	1.16165	0.0465383
SLC25A44	0.905222	0.0144729
SLC2A3	0.950285	0.0382861
SLC37A3	1.38244	0.024469
SLC51A	1.13768	0.0330358
SLC6A6	1.06771	0.0142952
SLC8A1	1.35453	0.0410194
SLCO4C1	1.90501	0.0131977
SLX1A	-1.43529	0.0385697
SMAP2	0.97072	0.0328731
SOCS1	-1.81141	0.0415275
SOD2	0.812367	0.0360148
SOD2-OT1	0.812367	0.0360148
SORL1	0.937964	0.0371044
SOS2	1.51014	0.010364
SP1	0.848466	0.0345883
SPARC	1.08415	0.0325609
SPNS3	-2.16524	0.0181761
SRPK1	1.21708	0.0202369
SSH1	1.09592	0.0101101
SSH2	1.04238	0.0300967
ST20	0.90226	0.0390652
ST6GALNAC2	0.844546	0.0473357
STAT5B	0.773365	0.0187025
STOML1	-1.34468	0.0340376
STXBP5	1.21281	0.0316249
SULT1B1	1.76774	0.00878243
SVIL	1.19236	0.0113106
TAOK3	0.767403	0.0353242
TBC1D14	0.903476	0.0479969
TBL1X	0.879313	0.0202454
TCF7L1	0.847951	0.0456153
TDP2	0.932734	0.0427613
TECPR2	1.17454	0.00326971
TEDC1	-1.49349	0.0400531
TEN1-CDK3	-1.82234	0.0056154
TGFA	1.33712	0.0292109
THBD	1.38064	0.0288477
TIAM2	1.27655	0.0077556
TIMM13	-1.10562	0.0461348
TLR1	1.13085	0.0189935
TLR2	1.18252	0.0208206
TLR4	1.42161	0.0157826
TLR5	1.66965	0.00344922
TLR6	1.24648	0.00799853
TLR8	1.16915	0.0498247
TMCC3	1.18853	0.0130342
TMCO3	1.04041	0.0292209
TMEM121B	0.963543	0.0357313
TMEM154	0.990553	0.0480676
TMX4	1.00192	0.0360122
TNFRSF10C	0.757895	0.039639
TNFRSF14	-0.900548	0.0348989
TNFSF14	1.09418	0.00385523
TNPO3	0.792894	0.0355104
TPM4	0.805877	0.0481284
TREM1	0.85295	0.0317727
TREML2	0.774723	0.0301105
TREML3P	1.4419	0.0108729
TREML4	2.12438	0.0044699
TRIB1	1.27959	0.0101461
TRIM8	0.726854	0.037071
TRPM6	0.905877	0.0395364
TSHZ3	1.31762	0.0248959
TSPAN4	-1.68924	0.0412229
TUBB2A	-2.16712	0.00763371
UBAP1	0.62132	0.0401587
UBE2D1	1.14561	0.0262924
UBE2G1	0.946874	0.0350492
UBE2J1	1.22819	0.0223908
UBE2R2	0.83217	0.00754485
UBR5-AS1	1.27592	0.0383326
UBXN2B	1.16131	0.024736
UHRF1BP1L	1.26543	0.0452914
UQCC3	-1.33965	0.0246444
UROD	-0.652779	0.049331
USB1	0.785024	0.0252882
USP10	0.790625	0.038136
USP32	0.882972	0.0220811
VAMP5	-1.39123	0.012679
VAPA	0.948732	0.0232085
VNN1	2.21559	0.00847947
VNN3	0.893023	0.0495226
VPS28	-0.748486	0.0381559
WDFY3	1.398	0.0120561
ZFAND3	0.662499	0.0421896
ZFP36L1	1.0554	0.00538461
ZNF185	1.05808	0.0365444
ZNF281	1.05058	0.0357848
ZNF438	0.976316	0.0298722
ZNF469	-1.48842	0.0423174
ZNF516	0.850205	0.0489379
ZNF608	2.42348	0.011036
ZSWIM6	1.17187	0.0392752

## Sheet: Supp_File_4_Coinfection_TPN
Node1	Node2
ADAM17	IL1R2
FKBP5	NR3C1
KLF5	EP300
IL18R1	IL1RAP
NFIL3	EP300
EPAS1	EP300
IL18	IL18R1
NEDD4	PTEN
ZEB1	HIF1A
MAK	CBL
IRAK4	IL1R1
NCOA6	EP300
EGLN1	HIF1A
SP3	EP300
HIPK2	HIF1A
NCOA2	HIF1A
GRB10	NEDD4
PIK3CB	HIF1A
FOXO4	IL18R1
PTEN	HIF1A
NCOA1	HIF1A
ETS2	EP300
BMX	CBL
MAP3K1	ETS2
RAC1	IL1R1
IL1R2	IL1RAP
FKBP5	MAP3K1
ZBTB18	NR3C1
CTBP2	EP300
MAP3K1	FKBP5
EP300	HIF1A
STAT6	IL1R1
IRS2	PIK3CB
GNG10	PIK3CB
PTGS2	EP300
PIK3CA	HIF1A
IL1R1	MAPK14
CBL	HIF1A
TDP2	ETS2
ZEB1	IL1R2
FLT3	PIK3CB
RB1	HIF1A
MDM2	EP300
EPAS1	EGLN1
RBPJ	EP300
SP1	HIF1A
MAP2K6	NFE2L2
BCL6	EP300
PIK3CG	HIF1A
GABPA	EP300
MDM2	HIF1A
EP300	ZEB1
IL1RAP	MAPK14
MAPK14	NR3C1
ARNTL	HIF1A
DAZAP2	NEDD4
IGF1R	PIK3CB
PRKAA1	EP300
ARNT	HIF1A
EPS15	NEDD4
ERG	ZEB1
MAPK1	HIF1A
GRB10	PIK3CA
MXD1	PTEN
SOS2	KRAS
MME	PIK3CB
IGF1R	NEDD4
MEF2A	EP300
FTH1	NR3C1
TLR5	TLR4
IL1RN	IL1R1
SIRPA	IL1RAP
CREB5	ATF2
TRIM24	NR3C1
ZBTB16	EP300
CREBBP	HIF1A
ELF1	NEDD4
E2F3	SP1
NR3C1	ETS2
KRAS	MAP3K1
TLR4	MAPK1
SP1	ETS2
SENP1	HIF1A
AHR	ZEB1
LYN	PIK3CB
TLR1	TLR4
CTBP2	HIPK2
ACTN1	NCOA1
RANBP9	HIPK2
IL1B	IL1R1
KRAS	PIK3CB
SLC25A4	NR3C1
PIK3CG	NFE2L2
LYN	KLF5
TGFA	IGF1R
PIK3R1	HIF1A
CXCR2	JAK2
SYNJ1	PIK3CB
EP300	NR3C1
NCOA2	NR3C1
DACH1	CREBBP
CUL3	NFE2L2
PTPN12	FLT3
MAP3K7	FKBP5
IRAK3	MYD88
MYD88	IL1R1
CEBPA	IL1R2
IRF2	EP300
SRPK1	MDM2
HSPA1A	NR3C1
ELF2	ERG
MEF2A	MAPK14
IFNGR2	NR3C1
CDC25A	MAPK1
NFKB1	IL1R1
FCGR2C	MAPK14
ING1	EP300
CSNK2A1	HIF1A
PAG1	NFE2L2
E2F3	BRCA1
HNRNPU	EP300
HGF	IGF1R
IL1RN	NR3C1
STAT3	HIF1A
MITF	HIF1A
FBXO11	BCL6
GNG5	PIK3CB
MED14	NR3C1
SH3GLB1	CBL
IL1RAP	IL1R1
EGF	IGF1R
PIAS3	EP300
UBE2D1	CBL
CAB39	PRKAA1
POU2F1	ETS2
RYBP	E2F3
SF3B1	EP300
HIF1A	NR3C1
REL	ZEB1
MAML1	EP300
CREBBP	ETS2
TGFBR1	HIPK2
SIAH1	HIPK2
TBK1	REL
TFCP2	HIF1A
STAT5B	ETS2
CHUK	PTEN
NUMB	MDM2
NUP98	EP300
ERF	ETS2
RUFY2	BMX
FCGR2A	LYN
POU2F1	ZEB1
MAP2K4	MAP3K1
TICAM2	IL18R1
NFKBIA	REL
ENC1	NFE2L2
PDGFC	IGF1R
CXCL5	CXCR2
VHL	HIF1A
DOK3	LYN
CREB5	EP300
ZFP36L1	MAPK14
FCER1G	PIK3CB
VAV3	PIK3CB
LYN	SOS2
NFKB1	HIF1A
PER1	HIF1A
PPFIA1	NCOA2
CSNK1D	HIF1A
SP1	NR3C1
PRKDC	NR3C1
ZBTB18	KLF5
TREM1	TLR4
OCRL	PIK3CB
GNG10	MAPK14
FOXO1	NEDD4
PROS1	F5
ADAM17	TGFA
SNW1	EP300
WSB1	HIPK2
GADD45A	MAPK14
TLR5	MYD88
PTPN12	JAK2
PIK3AP1	PIK3CB
MAPK3	HIF1A
MAP3K8	REL
PGK1	HIF1A
NEDD4	LYN
MDM2	NR3C1
MITF	EP300
ADAM9	SH3GLB1
IL15	FKBP5
SATB1	EP300
GNA13	PIK3CG
CLIP1	IQGAP1
JAK2	GRB10
NFE4	TFCP2
EPAS1	TGFA
IQGAP1	MAPK1
GNG11	PIK3CB
NFIL3	CREB5
BRCA1	HIF1A
F2RL1	CBL
PPP1CB	ATF2
GNAI3	PIK3CB
CDK1	HIF1A
RAF1	NR3C1
MAP3K2	MAPK1
MKNK1	MAPK1
NBN	EP300
JAK2	LYN
RASA2	KRAS
CEBPB	EP300
MAP3K7	HIPK2
RAP1A	PIK3CB
GTF2E2	KLF5
PPP2R5C	EP300
PPARA	EP300
YWHAH	NR3C1
PPM1D	MAPK14
PIK3R5	HIF1A
ROCK1	PTEN
OS9	HIF1A
DUSP1	MAPK14
FOXO1	ERG
RASGEF1A	KRAS
SOS2	PIK3R1
PDK1	EP300
AHR	NR3C1
FCGR2A	MAPK14
TLR5	NFKB1
JAK2	SIRPA
PAPOLA	REL
CALCOCO1	EP300
NCOR1	ETS2
SHOC2	KRAS
GAB2	PIK3CB
KAT2B	ZEB1
MDM4	EP300
IGF1R	SIRPA
MAP4K4	MAP3K1
GAB1	PIK3CB
YY1	HIF1A
CSF2RB	PIK3CB
MAPK14	EP300
RUNX2	EP300
ADAM17	MAPK1
STAT5B	NR3C1
AKTIP	CTBP2
PRKCI	MDM2
MME	LYN
NLK	HIPK2
FLT3	KRAS
LTB4R	GNG10
TICAM2	IL1R1
IL1R1	PIK3R1
KIF5B	NCOA2
RUFY1	BMX
MAPK13	ATF2
PRKCD	ADAM17
GNAQ	PIK3CA
COPS3	HIF1A
EPHB2	ADAM17
PMEPA1	NEDD4
LIMK1	IL1R1
CTNNB1	HIF1A
ADAM10	TGFA
NEDD4	NFE2
INHBB	ACVR1B
LTB4R2	GNG10
ETS2	E2F3
COL17A1	ACTN1
SMAD2	ZEB1
RPS6KA3	CREB1
DCAF6	NR3C1
NFAT5	MAPK14
ADM	MME
JAK2	PIK3CB
SNIP1	EP300
PIK3CD	HIF1A
PPP1CB	MDM2
F2RL1	TLR4
HIPK2	CREB1
TCF7L1	EP300
MBP	MAPK14
PRKCA	HIF1A
F5	CSNK2A1
NOTCH1	HIF1A
PPM1D	MDM2
HIF1A	E2F3
TNKS	PTEN
TRIB1	MAP2K4
CUL2	HIF1A
ING2	EP300
ITGB1	PIK3CB
HSF2	HIF1A
IL13RA1	JAK2
SYNJ1	AMPH
ZBTB16	NR3C1
CREBBP	NR3C1
CBLB	HIF1A
GRB10	MAPK1
CCNA2	E2F3
RAPGEF2	KRAS
SYNJ2	PIK3CB
GPS2	EP300
PPP1R3B	PPP1CB
CXCL16	CXCR2
JUN	HIF1A
NRIP1	NR3C1
HIF1A	EP300
BRAF	MAPK14
MAPK1	ETS2
ATM	HIF1A
NLK	NR3C1
SPOPL	CUL3
IL1R2	NFKB1
SPAG9	MAPK14
ZBTB14	HIF1A
FOXO4	HIF1A
CDK19	PTEN
CR1	PTGS2
MAX	HIF1A
GNB4	PIK3CB
SIAH2	HIPK2
GNA13	RHOA
CASP1	NEDD4
TNFRSF1B	BMX
ZNF160	TLR4
CDC42	PTEN
FLT3	STAT5B
BUB1	MDM2
ESR1	HIF1A
IDE	NR3C1
NR6A1	NFIL3
EPHB1	GRB10
NR3C1	BACH1
HIF1A	ARG1
NR3C1	DAAM2
IL1R1	IL1RAP
HIF1A	NFIL3
ETS2	SP3
ETS2	BMX
ETS2	NEDD4
NFE2L2	BACH1
ETS2	JUN
ATF2	DAAM2
HIF1A	ITGB3
IL1RAP	MYD88
HIF1A	PPP1R3B
HIF1A	TGFA
HIF1A	JUN
KLF5	E2F3
MYD88	IL1RAP
ZEB1	OTX1
HIF1A	CHSY1
BRCA1	BACH1
HIF1A	IPMK
IL18R1	JUN
ETS2	LYN
MAPK14	JUN
MAPK14	SP1
ETS2	DGKH
CBL	SOS2
IL1R1	NFKB1
NR3C1	OTX1
ETS2	SOS2
HIF1A	TLR2
KRAS	JUN
ETS2	PDE4D
ETS2	MAPK14
HIF1A	BCL6
ETS2	BCL6
MAPK14	ADAM17
IL1RAP	MAP2K6
TFCP2	BACH1
ETS2	RPS6KA3
HIF1A	MYLK
NR3C1	NFIL3
HIF1A	PDE4D
ETS2	TRIB1
IL1RAP	SIRPA
NEDD4	IGF1R
LYN	SP1
KRAS	MAPK14
ETS2	CAB39
NFE2	BACH1
MAPK14	MKNK1
ACVR1B	TDP2
E2F3	MAP3K5
CREB1	DAAM2
CBL	FLT3
ETS2	GRB10
MAPK1	AMPH
LYN	FCGR2A
LYN	PDE4D
TLR4	GNAI3
JAK2	PTPN12
AMPH	CDK5R1
NR3C1	NEDD4
TLR4	TLR1
BCL6	JUN
PTEN	SYNJ1
RHOA	DAAM2
HIF1A	RIT1
KRAS	MAPK1
BACH1	RNF182
ZEB1	RNF182
IL1R1	IL1RN
IL1R1	TRAF6
IL1R1	IRAK4
HIF1A	ASPH
ARG1	OAT
DAAM2	DVL3
IL1RAP	IL1R2
IL1R1	MAP3K3
MAPK14	CDC25A
NFIL3	OLFM4
IL1R1	MAPK9
SP3	ASPH
IL1RAP	MAPK13
IL1R1	MAPK8
MAPK14	MEF2A
IL1R1	CASP3
LYN	FCAR
ARG1	GATM
ARG1	FLOT1
BMX	RAP1A
ETS2	FSTL1
ETS2	THBD
ETS2	IL18RAP
NFIL3	ACSL4
ETS2	MMRN1
IL1R1	PRPF3
JUN	RNF182
NFIL3	HPGD
E2F3	CDC6
E2F3	TP53BP2
E2F3	RYBP
NFIL3	MCTP2
HIF1A	PFKFB2
ETS2	KLF9
LYN	FCGR2C
BMX	GAB1
MAPK14	MAP2K4
MAPK14	ZFP36L1
ETS2	HGF
ITGB3	THBS1
MYD88	TLR5
HIF1A	PDXP
E2F3	TOPBP1
ETS2	CCNJL
ETS2	SBF2
MYD88	IRAK3
PPP1R3B	PYGL
TGFA	SDCBP
MAPK14	MAP3K5
E2F3	PCSK6
ETS2	FCGR2C
ETS2	SHROOM1
NFIL3	PDZD8
ETS2	CD163
MAPK14	ATF6
IL1R1	AKT1
MAPK14	IFNAR1
ETS2	KRAS
ETS2	NFAT5
MAPK14	DUSP1
ETS2	RALB
BMX	FAS
LYN	MME
OTX1	BEST1
MAPK14	MBP
LYN	DOK3
CHSY1	CSGALNACT2
ETS2	ATP2B4
NEDD4	LITAF
IL1RAP	PRPF40A
ETS2	SSH1
IPMK	INPP5A
HIF1A	KLF9
MAPK14	FOSL2
ETS2	SPARC
MAPK14	ADD3
NFIL3	LGALSL
BMX	STAT3
SP1	ASPH
HIF1A	ENKUR
ETS2	RASA2
LYN	PEAK1
DGKH	MBOAT2
HIF1A	THAP5
NFKB1	OLFM4
ETS2	HPSE
E2F3	RB1
SOS2	PLCG2
HIF1A	TLR6
TLR2	TLR1
ETS2	SLPI
ETS2	CD93
BMX	CTTN
ETS2	COL6A3
BMX	RUFY2
E2F3	SUZ12
LYN	CHST15
HIF1A	PROK2
SOS2	SOS1
ETS2	GK
MAPK14	SLC44A1
HIF1A	TMTC1
ETS2	ZBTB18
ETS2	TMEM154
E2F3	FBN2
MAPK14	RBPJ
ETS2	MCC
MAPK14	FPR1
STAT5B	ASPH
HIF1A	PJA2
ETS2	RHOBTB1
ETS2	STRN
KRAS	SHOC2
MAPK14	PRKD3
PDE4D	AK9
SOS2	NRAS
MAPK14	PRKACA
ETS2	PTEN
IL1RAP	TICAM2
NEDD4	UBE2D3
BCL6	CDKN2B
MAP2K6	MAP3K20
HIF1A	ZNF217
IL1R1	MAP2K6
IL1RAP	RAC1
NFIL3	TMEM154
ETS2	GAS7
MAPK14	DUSP16
MAPK14	EPS15
HIF1A	MARCKS
MAPK14	PDE5A
MAPK14	ZFP36
ETS2	CPNE8
MAPK14	ATF2
HIF1A	CCNG2
RPS6KA3	PFKFB2
MYLK	CALD1
HIF1A	RLF
ETS2	PTPRC
ETS2	FBXL5
ETS2	FN1
ETS2	RAP2C
LYN	NEDD9
E2F3	FOXO1
ETS2	TMEM71
MAPK14	FOXO1
ETS2	CMTM6
HIF1A	SEC23A
HIF1A	BNIP2
E2F3	RBL1
E2F3	CCNA2
NFIL3	SECISBP2L
ETS2	PPP1R12A
ETS2	MCU
ETS2	ASH1L
MAPK14	HBP1
ETS2	ACTN1
ETS2	RLIM
HIF1A	TET2
SIRPA	JAK2
LYN	PRKDC
ITGB3	NUMB
ETS2	FLI1
ETS2	CCR1
NFIL3	YTHDF3
IL1R1	MAPK13
ETS2	MSN
BMX	FGFR1
IGF1R	GRB10
HIF1A	PFKFB3
ETS2	MSL3
ETS2	FHL1
LYN	FCER1G
NFIL3	JMJD1C
E2F3	NPAT
ETS2	CARD6
NEDD4	LAPTM5
KLF5	MYH11
HIF1A	RAD23B
ETS2	DOCK11
HIF1A	MTMR7
ETS2	ERG
ETS2	NEDD9
MAPK14	GMFB
NFIL3	PELI2
ETS2	APPL2
HIF1A	ZFP36L1
MAPK14	CREB1
ETS2	ACTR2
KLF5	CDKN2B
HIF1A	ZBTB37
ETS2	SH3BGRL
IL1RAP	STAT3
LYN	CSF2RA
HIF1A	MED13L
ETS2	MEFV
MKNK1	UBE2D1
HIF1A	EGLN1
BACH1	SYT2
BCL6	SIN3A
IPMK	PLCG2
ETS2	ITGA1
HIF1A	NRBF2
IPMK	PLCD4
MAP3K5	MAP3K2
HIF1A	DOK3
SOS2	CD2AP
HIF1A	PHLPP1
ETS2	FCER1G
ETS2	PIK3CG
HIF1A	NCOA1
SP3	ALPL
IPMK	IPPK
ETS2	MDM2
ETS2	RBPJ
NFIL3	ATXN1
RPS6KA3	PPP1R3B
NFIL3	TOB1
ETS2	GIT2
FLT3	PTPN12
DAAM2	DVL2
ETS2	PRKACA
ITGB3	GNA13
ETS2	SERINC2
LYN	PAG1
CHSY1	CSGALNACT1
LYN	JAK2
AMPH	SH3GLB1
LYN	PDE3B
HIF1A	ADM
MAPK14	SIAH2
ETS2	EPC2
LYN	SKAP2
ETS2	QPCT
ETS2	BRAF
PDE4D	AMPD3
SP3	ABCA1
IPMK	ITPKC
GNAI3	RGS18
NFIL3	MAP2K6
BMX	RUFY1
MAPK14	EEA1
HIF1A	BMP6
HIF1A	PCMTD1
ARG1	ODC1
NFIL3	RPS6KA3
CDK5R1	LMTK2
ETS2	GNG11
ETS2	FEM1C
ETS2	NCF2
PDE4D	ENTPD1
E2F3	CDK2
ETS2	VCL
HIF1A	ACOX1
ETS2	CLEC1B
ETS2	CAST
HIF1A	ZNF292
ZEB1	LRRN1
HIF1A	NCOA2
ETS2	REST
TLR1	TLR2
CDK5R1	CDK5RAP2
HIF1A	RELL1
ETS2	ARHGAP12
MAPK14	PPM1A
ETS2	SKAP2
ETS2	BUB1B
ETS2	PTPN11
ZEB1	ST6GALNAC3
ETS2	KIAA0040
HIF1A	ARRDC3
CDK5R1	ACTN1
ETS2	RNF138
LYN	CSF2RB
MYD88	TLR6
ETS2	ADAM10
ETS2	TREML2
ETS2	STAT5B
MAPK14	NCOA3
HIF1A	PTEN
ETS2	FTH1
IGF1R	NAMPT
RPS6KA3	PPP1R3D
SOS2	TRIM27
BCL6	LITAF
MAPK14	SMAD2
HIF1A	TAB3
HIF1A	LTBP1
HIF1A	GNAQ
ETS2	IGF2R
HIF1A	SLC2A3
DGKH	PLCD4
ETS2	TNKS2
RIT1	LRIF1
ETS2	CLINT1
ETS2	YTHDC1
MAPK14	ETV6
HIF1A	CHST15
MAPK14	ESR2
ETS2	TSC22D2
ETS2	TCP11L2
MAPK14	JDP2
MAPK14	PXN
CDC25A	CUX1
MKNK1	EIF4G3
PRKACA	RPH3A
ETS2	ZEB2
TRAF6	TDP2
MYD88	PELI1
MYD88	TLR8
MYD88	TLR1
ETS2	NIPBL
E2F3	FBXO5
HIF1A	ITCH
HERC5	ISG15
IRF7	ISG15
MX1	ISG15
STAT2	ISG15
DHX58	IRF7
SPIB	IRF7
STAT1	ISG15
KAT2A	IRF7
DDX58	ISG15
FLNB	ISG15
ZBP1	IRF7
AIP	IRF7
IRF1	ISG15
UBE2N	ISG15
SOCS1	STAT1
HSPD1	ISG15
IRF8	ISG15
IRF5	IRF7
YBX1	ISG15
IRAK1	IRF7
IKBKE	IRF7
MYC	HERC5
SMAD3	IRF7
SREBF1	DHX58
PDCD1	SOCS1
DHX30	DHX58
ATF4	IRF7
CSF1R	SOCS1
NA	SOCS1
VAV2	SOCS1
DBP	SPIB
PIAS4	IRF7
TICAM1	IRF7
CISH	STAT2
TMEM173	IRF7
TRIM21	IRF7
RELA	IRF7
TRMT61B	IRF7
LCK	STAT2
ITK	SOCS1
PRPF3	IRF7
GATA3	MX1
MAZ	DHX58
PIM2	SOCS1
MSN	ISG15
MAFB	IRF7
TUBB	MX1
PPP2R2B	STAT2
MAVS	IRF7
IRF9	STAT2
IFIT3	DDX58
REPIN1	STAT2
RACK1	STAT2
H2AFX	KAT2A
CSF1	SOCS1
IRF3	ISG15
TICAM2	IRF7
ANO9	STAT1
KAT2B	IRF7
VAV1	SOCS1
PTPN6	SOCS1
CCNB1	HERC5
PPP2R1A	STAT2
PIDD1	CCDC85B
ERBB2	STAT1
BRCA1	IRF7
ID3	SREBF1
FBF1	CCDC85B
NFKB1	IRF7
TNFAIP3	IRF7
IRAK4	IRF7
INSR	SOCS1
GRB2	SOCS1
CCDC85B	POLR2L
POLE4	NME3
CD4	HLA-DQA1
TRAF4	IRAK1
TRADD	STAT1
SMAD2	IRF7
ANK3	SMAD3
EFNA4	CSF1R
SIRT2	KAT2A
MYB	SPIB
ISG15	RACK1
TRAF6	IRF7
CARD9	CCDC85B
SOCS2	STAT1
NKRF	DHX58
POLR2I	NME3
CBFA2T3	STAT2
TIRAP	IRF7
MAPKAPK2	SPIB
CEBPA	SPIB
PARP10	MYC
SIGIRR	IRAK1
CCDC47	IRF7
THAP7	CCDC85B
TYK2	STAT2
AK5	NME3
NCK1	SOCS1
COPS4	STAT2
ZAP70	LCK
ISG15	STAT1
TBK1	IRF7
HDAC1	STAT2
TRIM8	SOCS1
IRF4	IRF7
STAT4	STAT1
TRIM28	STAT1
IL27RA	STAT1
CD19	VAV2
COL6A2	PRPF3
CYTH1	STAT2
MYD88	IRF7
FOXP3	HLA-DQB1
SERPING1	PRPF3
TANK	IRF7
ETS1	ISG15
IL11RA	STAT1
LAT	LCK
ISG15	IRF3
ESR1	MX1
IRF1	HLA-DQA1
HLA-DQA1	CD4
CEBPD	SPIB
TNFRSF25	TRADD
APP	DHX58
RFXANK	HLA-DQA1
TBP	SPIB
XRCC6	KAT2A
UNC119	HLA-DQA1
RFX5	HLA-DQA1
TGFBR1	IRF7
SP1	SOCS1
ERBB2	SOCS1
SRC	STAT1
STAT2	SOCS1
PDGFB	ERBB2
AK1	NME3
PKN1	CCDC85B
CD79B	LCK
CHUK	IRF7
DNM2	STAT2
IL3RA	CISH
SARM1	IRAK1
MAP3K5	SOCS1
HLA-DRB5	CD4
MCRS1	CCDC85B
POLR1C	NME3
PPP2R1B	STAT2
HLA-DQB1	CD4
SREBF1	FOXP3
ENTPD6	NME3
CD4	LCK
NR1H2	SREBF1
POLR2L	NME3
BEX2	CCDC85B
DOK2	LCK
DDB1	STAT1
RIPK3	ZBP1
CD247	LCK
ITGB7	RACK1
PYCARD	DDX58
POLR3H	NME3
NME3	POLR2L
IL7R	STAT1
IL15	ZBP1
RBX1	SMAD3
FAN1	PRPF3
ZNRD1	NME3
TNFSF12	TNFRSF25
CSNK2A2	SPIB
POLR3K	NME3
CXCR4	STAT2
CD8B	LCK
CEBPB	SPIB
CD5	LCK
NCF1	TRAF4
POLD4	NME3
IGF1R	SOCS1
PRMT1	STAT1
TRAT1	LCK
KAT2A	SOCS1
PPARGC1B	SREBF1
PDE4A	AIP
AQP1	CCDC85B
TRAF2	FBF1
E2F4	STAT2
IFIH1	DDX58
POLR2F	NME3
LZTS2	CCDC85B
TACC3	KAT2A
PLOD3	CCDC85B
JAK3	STAT2
STAT6	STAT2
HDDC3	NME3
HRAS	IRAK1
AGO2	DHX58
PSMF1	CCDC85B
POLD2	NME3
POLD1	NME3
NT5C3B	ITPA
PTCRA	LCK
RFXAP	HLA-DQA1
HLA-DPB1	CD4
HDAC3	STAT1
HLA-DRB1	CD4
MADD	PIDD1
DVL1	SMAD3
ZNF764	CCDC85B
CD3E	LCK
IRF7	ERBB2
STAT4	SOCS1
TP53	STAT1
CDKN1A	CCDC85B
HMG20B	CCDC85B
SMPD3	XRCC6
POLR3D	NME3
NFYB	HLA-DQA1
PPP2R2D	STAT2
SOCS7	STAT1
PEX6	SMAD3
DICER1	DHX58
BCKDK	TRAF4
PTPRM	RACK1
PML	MYC
TRIP6	IRAK1
POLR2K	NME3
UNC93B1	IRAK1
RUNX1	STAT2
UTP6	CCDC85B
ISG15	IFIT1
ISG15	IFIT3
ISG15	UBE2L6
HLA-DQA1	CD247
ISG15	LAP3
RACK1	TUBB2A
STAT1	SERPING1
HLA-DQB1	HLA-DRB1
IRF3	IRF7
HLA-DQA1	HLA-DRB1
ISG15	EEF1G
ISG15	PSMA7
ISG15	GSTP1
ISG15	MX1
SOCS1	ELOB
ISG15	RPS27A
STAT1	SOCS1
NME3	ITPA
ISG15	ATIC
ISG15	FASN
POLR2L	CCDC85B
STAT1	FOXP3
ISG15	DDX58
ITPA	NME3
STAT1	SMPD3
ISG15	TAGLN
ISG15	RPL24
IFIT1	EIF3E
ISG15	GBP1
ISG15	WARS
ISG15	FARS2
ISG15	IFIT5
ISG15	MYOF
ISG15	AAAS
ISG15	ACOT8
ISG15	CCT2
IFIT3	TRAF2
ISG15	LMNA
ISG15	CCT3
ISG15	PLOD3
ISG15	GPI
ISG15	CCT4
ISG15	HSPA8
ISG15	ATP5B
ISG15	PRDX1
ISG15	FAM120C
ISG15	RPL27A
ISG15	ATP5A1
ISG15	PHGDH
ISG15	RAN
ISG15	FLNA
ISG15	DDB2
IFIT3	TRAF3
ISG15	EEF2
STAT1	LRFN4
ISG15	SF3A2
ISG15	ABCF2
ISG15	NUP43
ISG15	GANAB
ISG15	XRCC6
ISG15	PLEC
ISG15	LGMN
ISG15	PYM1
ISG15	ANXA2
ISG15	WDR33
UBE2L6	UBB
ISG15	ATXN2L
ISG15	ENO1
ISG15	DNAJB1
ISG15	SNRNP200
ISG15	PTBP1
ISG15	UBA7
ISG15	OGDH
ISG15	PFN1
ISG15	HNRNPL
ISG15	ALDOA
ISG15	ZC3H15
STAT1	XAF1
ISG15	HSPD1
ISG15	AHNAK
STAT1	CCDC85B
ISG15	CHMP5
ISG15	MYNN
ISG15	LMAN2
ISG15	CFL1
STAT1	CLC
ISG15	ELAVL1
ISG15	MAP4
ISG15	G3BP1
ISG15	MAPKAPK5
ISG15	PKM
ISG15	TARS
ISG15	EZR
ISG15	XRCC5
ISG15	TKT
ISG15	EIF4G1
ISG15	WDR1
ISG15	CLIC1
IRF3	HERC5
ISG15	RDH11
ISG15	ANXA5
ISG15	SF3B4
NME3	POLE4
CD247	FCGR3B
ISG15	ACLY
STAT1	TRAF4
ISG15	HNRNPA2B1
ISG15	EIF2AK2
ISG15	TOP2A
ISG15	ACTN4
LAP3	GSS
ISG15	GDI2
ISG15	NFIX
ISG15	RBBP4
ISG15	VCP
ISG15	SERBP1
ISG15	PGK1
TUBB2A	TBCD
ISG15	PLOD1
ISG15	IFIT2
ISG15	VIM
NME3	POLR2I
ISG15	TAF2
ISG15	ARID5B
STAT1	SEC14L2
ISG15	UBAP2L
ISG15	FUBP3
NME3	AK5
ISG15	CSNK2A1
ISG15	DDX42
TUBB2A	NCALD
ISG15	PAFAH1B1
ISG15	HNRNPK
SERPING1	C1QA
STAT1	CIITA
ISG15	CLK1
HLA-DRB1	CTSL
STAT1	ZAP70
ISG15	HNRNPU
IRF7	BATF2
ISG15	GSR
NME3	CMPK2
ISG15	SENP1
ISG15	CLTC
ISG15	CHD1
ISG15	CCNL1
EEF1G	OGFOD2
ISG15	ATXN2
NME3	DTYMK
PSMA7	PSMB10
IFIT3	MAVS
GSTP1	GSTM3
MX1	DAXX
RACK1	ITGB7
ELOB	ASB2
RPS27A	RPSA
NME3	DCTPP1
ISG15	JAK1
NME3	AK1
IRF3	CD40
ISG15	YTHDC1
ISG15	LDHA
NME3	POLR1C
HLA-DQB1	HLA-DQA1
NME3	ENTPD6
EEF1G	MVD
ITPA	NT5C3B
STAT1	PCYT2
ISG15	DYRK1A
ISG15	SIN3A
STAT1	MRPL54
ITPA	APRT
TUBB2A	TK1
ATIC	NT5C3B
HLA-DRB1	CTSF
FASN	MCAT
STAT1	IL12RB1
SERPING1	ELANE
NME3	POLR3H
CCDC85B	C19orf25
SOCS1	VAV2
NME3	POLR3K
ATIC	ITPA
CCDC85B	FAM50B
STAT1	TSTA3
NME3	POLD4
STAT1	PSMB9
STAT1	SSBP4
STAT1	STAT2
CCDC85B	PKN1
ISG15	TMOD3
DDX58	DHX58
IRF7	NOG
NME3	POLR2F
ISG15	MSN
ISG15	ACTN1
ISG15	TXNRD1
NME3	POLD2
NME3	POLD1
SOCS1	PIK3R2
CD247	CD3D
HLA-DQB1	HLA-DRB5
SMPD3	PLPP1
GSTP1	MGST3
STAT1	PML
IRF3	ZBP1
LAP3	GCLC
SERPING1	C1QB
STAT1	COX8A
EEF1G	RPS28
ISG15	PGD
TUBB2A	PLK1
TAGLN	RNF14
NME3	POLR3D
IRF7	EPSTI1
SOCS1	IL2RB
SOCS1	ITK
PSMA7	PSME2
ISG15	ANXA3
NME3	POLR2K
RPL24	RPS19
SOCS1	IRAK1
RPS27A	RPS2
POLR2L	EXOSC5
IRF7	BST2
TUBB2A	ARHGEF2
IRF7	TMEM229B
SERPING1	C1QC
IRF7	LGALS3BP
IRF7	DDX60
SOCS1	PIM2
SMPD3	COPS6
IRF7	PARP12
EIF3E	EIF3K
IRF7	MOV10
IRF7	SLC12A7
EIF3E	EIF3B
EIF3E	EIF3G
TRAF4	ARHGEF10L
EIF3E	EIF3F
IRF7	ZDHHC14
IRF7	ATP5G2
SOCS1	VAV1
SOCS1	IRS1
IRF7	EVL
IRF7	CMTR1
IRF7	TRMT2A
IRF7	MRPS18B
FOXP3	ADARB2
EIF3E	EIF3I
IRF7	ABI3
IRF7	AIP
SOCS1	ELOC
SMPD3	GBA2
XAF1	BIRC3
TRAF4	TRPV1
IRF7	GPR162
IRF7	CACNA2D3
NME3	POLR3GL
CCDC85B	GFI1B
SMPD3	CERS5
NME3	POLR1E
EIF3E	EIF3C
SMPD3	CERK
EIF3E	EIF3L
SMPD3	CERS4
NME3	POLE
SMPD3	PLEKHM1
FOXP3	RSAD2
SMPD3	RBM48
FOXP3	ASB2
IRF7	IL18BP
SMPD3	GBA
TRAF2	TNFRSF14
IRF7	OASL
CCDC85B	ZNF764
IRF7	CDC34
TRAF2	THAP7
TRAF4	PTCH1
NME3	POLA2
IRF7	FAM50A
TRAF4	EDC4
NME3	POLR2J
SMPD3	SETDB1
EIF3E	EIF3D
TRAF4	REEP4
EIF3E	EIF3H
EIF3E	COPS7A
IRF7	SEPT9
IRF7	ALKBH6
NME3	TWISTNB
NME3	LOC101060521
NME3	POLR3E
SOCS1	CRKL
CCDC85B	PLOD3
EIF3E	EIF1
CCDC85B	ZNF337
NME3	PRIM2
CCDC85B	RNF8
NME3	UBQLN4
IRF7	PLEK2
UBB	RPS9
IRF7	MAP2K5
NME3	POLR3C
NME3	NTPCR
STAT2	IFI44
EIF3E	COPS7B
NME3	POLR2J3
FOXP3	RORC
SMPD3	CERS6
ZAP70	LAT
IRF7	AAMP
SMPD3	CERS2
SERPING1	C1R
FOXP3	FCGR3B
CCDC85B	HMG20B
TRAF4	STOML2
SERPING1	MASP2
IRF7	NABP2
SOCS1	PIK3R1
IRF7	ZMYND15
STAT1	APBA3
HNRNPK	NPDC1
TRAF4	LGALS12
STAT1	B3GAT3
STAT1	CTSL
TRAF4	ZDHHC21
HSPA8	HSPBP1
HLA-DQB1	HLA-DPA1
HLA-DQB1	HLA-DOB
PLPP1	PLD4
HLA-DQB1	HLA-DRA
HLA-DQB1	HLA-DMB
C1QA	C4B
HLA-DQB1	HLA-DMA
HLA-DQB1	HLA-DOA
ITPA	NT5C
HLA-DQB1	HLA-DQA2
ITPA	IMPDH2
C1QA	C4A
NT5C3B	NAPRT
NT5C3B	QPRT

## Sheet: Supp_File_5_Classification_likelihood_gene_signature
Likelihood of classification into onlyCovid-19 or Bacterial coinfection categorues based 9 gene-signature
ID	Initial_class	Predicted_class	OnlyCovid_Likelihood	Coinfection_likelihood
Cov_1	Only COVID-19	Only COVID-44	1	2.22045e-16
Cov_10	Only COVID-20	Coinfection	3.25384e-05	0.999967
Cov_11	Only COVID-21	Only COVID-27	1	4.28213e-13
Cov_12	Only COVID-22	Only COVID-49	1	2.22045e-16
Cov_13	Only COVID-23	Only COVID-39	1	2.22045e-16
Cov_14	Only COVID-24	Only COVID-35	1	2.22045e-16
Cov_15	Only COVID-25	Only COVID-41	1	2.22045e-16
Cov_16	Only COVID-26	Only COVID-36	1	2.22045e-16
Cov_17	Only COVID-27	Coinfection	2.22045e-16	1
Cov_18	Only COVID-28	Only COVID-40	1	2.22045e-16
Cov_19	Only COVID-29	Only COVID-21	0.999902	9.78755e-05
Cov_2	Only COVID-30	Only COVID-30	1	2.22045e-16
Cov_20	Only COVID-31	Only COVID-42	1	2.22045e-16
Cov_21	Only COVID-32	Only COVID-20	0.999656	0.000343959
Cov_22	Only COVID-33	Only COVID-38	1	2.22045e-16
Cov_23	Only COVID-34	Only COVID-26	1	7.5373e-13
Cov_24	Only COVID-35	Only COVID-28	1	2.22045e-16
Cov_25	Only COVID-36	Only COVID-37	1	2.22045e-16
Cov_26	Only COVID-37	Only COVID-32	1	2.22045e-16
Cov_27	Only COVID-38	Only COVID-31	1	2.22045e-16
Cov_3	Only COVID-39	Only COVID-46	1	2.22045e-16
Cov_4	Only COVID-40	Only COVID-48	1	2.22045e-16
Cov_5	Only COVID-41	Only COVID-45	1	2.22045e-16
Cov_6	Only COVID-42	Only COVID-47	1	2.22045e-16
Cov_7	Only COVID-43	Only COVID-34	1	2.22045e-16
Cov_8	Only COVID-44	Only COVID-33	1	2.22045e-16
Cov_9	Only COVID-45	Coinfection	1.891e-08	1
Pb_1	Probable Coinfection	Coinfection	2.22045e-16	1
Pb_10	Probable Coinfection	Coinfection	8.80776e-12	1
Pb_11	Probable Coinfection	Coinfection	1.65617e-05	0.999983
Pb_12	Probable Coinfection	Coinfection	2.22045e-16	1
Pb_13	Probable Coinfection	Coinfection	2.22045e-16	1
Pb_14	Probable Coinfection	Coinfection	2.22045e-16	1
Pb_15	Probable Coinfection	Coinfection	2.22045e-16	1
Pb_16	Probable Coinfection	Coinfection	2.22045e-16	1
Pb_17	Probable Coinfection	Only COVID-29	1	2.22045e-16
Pb_18	Probable Coinfection	Coinfection	2.22045e-16	1
Pb_2	Probable Coinfection	Coinfection	2.22045e-16	1
Pb_3	Probable Coinfection	Coinfection	2.22045e-16	1
Pb_4	Probable Coinfection	Coinfection	2.22045e-16	1
Pb_5	Probable Coinfection	Coinfection	2.22045e-16	1
Pb_6	Probable Coinfection	Only COVID-43	1	2.22045e-16
Pb_7	Probable Coinfection	Coinfection	2.22045e-16	1
Pb_8	Probable Coinfection	Coinfection	2.22045e-16	1
Pb_9	Probable Coinfection	Only COVID-22	1	4.61686e-07
Sb_1	Suspected Coinfection	Only COVID-69	1	2.22045e-16
Sb_10	Suspected Coinfection	Coinfection	2.22045e-16	1
Sb_11	Suspected Coinfection	Coinfection	2.22045e-16	1
Sb_12	Suspected Coinfection	Coinfection	2.22045e-16	1
Sb_13	Suspected Coinfection	Only COVID-56	1	2.22045e-16
Sb_14	Suspected Coinfection	Coinfection	2.22045e-16	1
Sb_15	Suspected Coinfection	Coinfection	2.22045e-16	1
Sb_16	Suspected Coinfection	Only COVID-53	1	2.22045e-16
Sb_17	Suspected Coinfection	Coinfection	4.8851e-12	1
Sb_18	Suspected Coinfection	Only COVID-73	1	2.22045e-16
Sb_19	Suspected Coinfection	Only COVID-72	1	2.22045e-16
Sb_2	Suspected Coinfection	Only COVID-64	1	2.22045e-16
Sb_20	Suspected Coinfection	Only COVID-71	1	2.22045e-16
Sb_21	Suspected Coinfection	Only COVID-24	1	9.60113e-11
Sb_22	Suspected Coinfection	Only COVID-68	1	2.22045e-16
Sb_23	Suspected Coinfection	Coinfection	1.16832e-05	0.999988
Sb_24	Suspected Coinfection	Only COVID-25	1	4.41591e-12
Sb_25	Suspected Coinfection	Only COVID-67	1	2.22045e-16
Sb_26	Suspected Coinfection	Only COVID-52	1	2.22045e-16
Sb_27	Suspected Coinfection	Only COVID-66	1	2.22045e-16
Sb_28	Suspected Coinfection	Coinfection	2.22045e-16	1
Sb_29	Suspected Coinfection	Only COVID-65	1	2.22045e-16
Sb_3	Suspected Coinfection	Only COVID-63	1	2.22045e-16
Sb_30	Suspected Coinfection	Coinfection	2.22045e-16	1
Sb_31	Suspected Coinfection	Coinfection	6.65754e-09	1
Sb_32	Suspected Coinfection	Only COVID-19	0.936564	0.0634357
Sb_33	Suspected Coinfection	Only COVID-61	1	2.22045e-16
Sb_34	Suspected Coinfection	Only COVID-60	1	2.22045e-16
Sb_35	Suspected Coinfection	Only COVID-55	1	2.22045e-16
Sb_36	Suspected Coinfection	Only COVID-59	1	2.22045e-16
Sb_37	Suspected Coinfection	Only COVID-58	1	2.22045e-16
Sb_38	Suspected Coinfection	Coinfection	2.22045e-16	1
Sb_39	Suspected Coinfection	Only COVID-77	1	2.22045e-16
Sb_4	Suspected Coinfection	Only COVID-51	1	2.22045e-16
Sb_40	Suspected Coinfection	Coinfection	2.22045e-16	1
Sb_41	Suspected Coinfection	Coinfection	2.22045e-16	1
Sb_42	Suspected Coinfection	Only COVID-50	1	2.22045e-16
Sb_43	Suspected Coinfection	Coinfection	2.22045e-16	1
Sb_44	Suspected Coinfection	Coinfection	2.22045e-16	1
Sb_45	Suspected Coinfection	Only COVID-76	1	2.22045e-16
Sb_46	Suspected Coinfection	Only COVID-75	1	2.22045e-16
Sb_47	Suspected Coinfection	Only COVID-74	1	2.22045e-16
Sb_5	Suspected Coinfection	Only COVID-70	1	2.22045e-16
Sb_6	Suspected Coinfection	Only COVID-62	1	2.22045e-16
Sb_7	Suspected Coinfection	Only COVID-54	1	2.22045e-16
Sb_8	Suspected Coinfection	Only COVID-57	1	2.22045e-16
Sb_9	Suspected Coinfection	Only COVID-23	1	4.32952e-09
